# Supplementary material for: Validation of the qi blood yin yang deficiency questionnaire on chronic fatigue
Source: PubMed Central journal article supplement (PMC4852426; doi:10.1186/s13020-016-0092-y), 2016-05-02
Supplement: 13020_2016_92_MOESM1_ESM.pdf [file 13020_2016_92_MOESM1_ESM.pdf]

## Background

|                       |                                                                                         |                              |    |  |
|-----------------------|-----------------------------------------------------------------------------------------|------------------------------|----|--|
| Scientific Title      | A Study on Reliability and Validity of the 'Qi Blood Yin Yang Deficiency Questionnaire' |                              |    |  |
| CRIS Registration No. | KCT0001199                                                                              |                              |    |  |
| Investigate           | No                                                                                      | Registered at Other Registry | No |  |

## Contact Details & Status

|                                                                |             |                                                        |                                                        |                           |            |
|----------------------------------------------------------------|-------------|--------------------------------------------------------|--------------------------------------------------------|---------------------------|------------|
| Contact Person for Principal Investigator / Scientific Queries | Teakwon Ahn | Cheonan Korean Medicine Hospital of Daejeon University |                                                        |                           |            |
| Study Center                                                   | Single      | Participating Institute Name                           | Cheonan Korean Medicine Hospital of Daejeon University |                           |            |
| Overall Recruitment Status                                     | Completed   | Primary Completion Date                                | 2014-06-30                                             | Study Completion Date     | 2014-06-30 |
| Target Sample Size                                             | 150         | Date of First Enrollment                               | 2014-05-12                                             | State of First Enrollment | Actual     |

## Source of Monetary/Material Support & Sponsor Organization

|                                        |                                      |
|----------------------------------------|--------------------------------------|
| Source of Monetary /Material Support 1 | Korea Institute of Oriental Medicine |
| Sponsor Organization 1                 | Korea Institute of Oriental Medicine |

## Study Summary

|             |                                                                                                                                                                                                                                                                                                                                                                                                                           |
|-------------|---------------------------------------------------------------------------------------------------------------------------------------------------------------------------------------------------------------------------------------------------------------------------------------------------------------------------------------------------------------------------------------------------------------------------|
| Lay Summary | This clinical study on chronic fatigue is investigative research that seeks to report the correlations between questionnaire results and syndrome differentiation diagnosis made by doctors, and to verify reliability and validity of 'Qi Blood Yin Yang Deficiency Questionnaire' which is completed as self-administered/reported questionnaire by both chronic fatigue group and non-chronic fatigue group (control). |
|-------------|---------------------------------------------------------------------------------------------------------------------------------------------------------------------------------------------------------------------------------------------------------------------------------------------------------------------------------------------------------------------------------------------------------------------------|

## Study Design

|                     |                     |                           |              |                  |                |
|---------------------|---------------------|---------------------------|--------------|------------------|----------------|
| Study Type          | Observational Study | Observational Study Model | Case-control | Time Perspective | Crosssectional |
| Cohort/Group Number | 2                   |                           |              |                  |                |

|                         |                           |                                        |                      |                                                                                                                                                                                                                                                                                                                       |
|-------------------------|---------------------------|----------------------------------------|----------------------|-----------------------------------------------------------------------------------------------------------------------------------------------------------------------------------------------------------------------------------------------------------------------------------------------------------------------|
| Cohort/<br>Group 1      | Cohort/<br>Group<br>Label | Chronic fatigue group                  | Group<br>Description | Subjects(n=120) diagnosed with chronic fatigue syndrome and Idiopathic Chronic Fatigue for using chronic fatigue syndrome criteria of Centers for Disease Control and Prevention(CDC). Compare and analyze 'Qi blood yin yang deficiency questionnaire score' of Chronic fatigue group and none chronic fatigue group |
| Cohort/<br>Group 2      | Cohort/<br>Group<br>Label | none chronic fatigue group             | Group<br>Description | Subjects(n=30) diagnosed with none chronic fatigue for using chronic fatigue syndrome criteria of Centers for Disease Control and Prevention(CDC). Compare and analyze 'Qi blood yin yang deficiency questionnaire score' of Chronic fatigue group and none chronic fatigue group                                     |
| Biospecimen Retention   |                           | DNA Collect Archive Sample without DNA |                      |                                                                                                                                                                                                                                                                                                                       |
| Biospecimen Description |                           | blood, urine                           |                      |                                                                                                                                                                                                                                                                                                                       |

## Subject Eligibility

|                              |                                                                                                                                                                                                                                                                                                                                                                                                                                                                                                                                                                                                                                                                                                                                                                                                                                                                                                                                                                                                                                                                                                                                                                                                                                                                                                                                                                                                                                                                                                       |              |                     |                              |
|------------------------------|-------------------------------------------------------------------------------------------------------------------------------------------------------------------------------------------------------------------------------------------------------------------------------------------------------------------------------------------------------------------------------------------------------------------------------------------------------------------------------------------------------------------------------------------------------------------------------------------------------------------------------------------------------------------------------------------------------------------------------------------------------------------------------------------------------------------------------------------------------------------------------------------------------------------------------------------------------------------------------------------------------------------------------------------------------------------------------------------------------------------------------------------------------------------------------------------------------------------------------------------------------------------------------------------------------------------------------------------------------------------------------------------------------------------------------------------------------------------------------------------------------|--------------|---------------------|------------------------------|
| Study Population Description | In this study, the standards for chronic fatigue syndrome and idiopathic chronic fatigue defined by Centers for Disease Control and Prevention (CDC) in 1994 are applied; 120 males and females aged over 20 and under 39 years who are diagnosed with chronic fatigue syndrome or idiopathic chronic fatigue, and 30 males and females aged over 20 and under 39 years who are not diagnosed with chronic fatigue syndrome or idiopathic chronic fatigue will be recruited.                                                                                                                                                                                                                                                                                                                                                                                                                                                                                                                                                                                                                                                                                                                                                                                                                                                                                                                                                                                                                          |              |                     |                              |
| Sampling Method              | non-probability sampling                                                                                                                                                                                                                                                                                                                                                                                                                                                                                                                                                                                                                                                                                                                                                                                                                                                                                                                                                                                                                                                                                                                                                                                                                                                                                                                                                                                                                                                                              |              |                     |                              |
| Condition(s) /Problem(s)     | * Symptoms, signs and abnormal clinical and laboratory findings , NEC<br>F48.0 피로증후군<br>R53 권태감 및 피로                                                                                                                                                                                                                                                                                                                                                                                                                                                                                                                                                                                                                                                                                                                                                                                                                                                                                                                                                                                                                                                                                                                                                                                                                                                                                                                                                                                                  | Rare Disease | No                  |                              |
| Gender                       | Both                                                                                                                                                                                                                                                                                                                                                                                                                                                                                                                                                                                                                                                                                                                                                                                                                                                                                                                                                                                                                                                                                                                                                                                                                                                                                                                                                                                                                                                                                                  | Age          | 20(Year) ~ 39(Year) | Accepting Healthy Volunteers |
| Inclusion Criteria           | (1) males and females aged 20 to 39; (2) the presence of unexplained fatigue that is continuous and repetitive for more than 6 months; (3) not chronic fatigue syndrome and idiopathic chronic fatigue; (4) agreement of doctor diagnosis; and (5) those who consent to participate in this trial and sign an informed consent statement after listening to a clear explanation of the purpose and characteristics of this clinical trial                                                                                                                                                                                                                                                                                                                                                                                                                                                                                                                                                                                                                                                                                                                                                                                                                                                                                                                                                                                                                                                             |              |                     |                              |
| Exclusion Criteria           | (1) over 14 score of Perceived Stress Scale-10item(PSS-10item); (2) disagreement of 2 doctors' diagnoses; (3) the presence of the following conditions in the subject's past history that might trigger chronic fatigue: (a) organic causes, such as acute or chronic liver disease (for example, hepatitis, liver cirrhosis), anemia, tuberculosis, chronic lung disease, cardiovascular disease (for example, heart failure , hypertension), endocrine/metabolic disease (for example, diabetes, thyroid gland disease, severe obesity), autoimmune disease (for example, rheumatoid arthritis, systemic lupus erythematosus, multiple sclerosis), malignant tumors, or infectious disease; and (b) psycho-social causes, such as depression, anxiety neurosis, recent severe stress, schizophrenia, alcoholism, or an eating disorder (anorexia nervosa, bulimia nervosa); (4) subjects who have taken the following drugs within the past 2 weeks: antihypertensive drugs, antidepressants, anti-anxiety agents, hypnotics, or antihistamines; (5) pregnant or breast-feeding women; (6) subjects who are participating in other clinical trials; (7) subjects who are overworked; (8) subjects who have experienced a hypersensitive reaction after clinical laboratory test; (9) subjects who equipped to a cardiac pacemaker ; (10) subjects who do not provide informed consent; and (11) others whose clinical trial conductors are considered inappropriate for participating in this trial |              |                     |                              |

## Outcome Measure(s)

|                         |                |                                                                                    |           |                                         |
|-------------------------|----------------|------------------------------------------------------------------------------------|-----------|-----------------------------------------|
| Type of Primary Outcome | Not applicable |                                                                                    |           |                                         |
| Primary Outcome 1       | Outcome        | Questionnaire results on the syndrome differentiation of consumptive disease       | Timepoint | After completion of the clinical trials |
| Secondary Outcome 1     | Outcome        | Korean medical doctors' diagnosis results on the syndrome differentiation          | Timepoint | After completion of the clinical trials |
| Secondary Outcome 2     | Outcome        | Health-related clinical pathology examination results                              | Timepoint | After completion of the clinical trials |
| Secondary Outcome 3     | Outcome        | Score of stress response inventory (Fatigue Severity Scale, Chalder Fatigue Scale) | Timepoint | After completion of the clinical trials |
| Secondary Outcome 4     | Outcome        | Analytical variables of tongue image obtained through tongue imaging system        | Timepoint | After completion of the clinical trials |
| Secondary Outcome 5     | Outcome        | Output variables of dermometer (DDFAO)                                             | Timepoint | After completion of the clinical trials |

## Publication

|                        |   |
|------------------------|---|
| Number of publications | 0 |
|------------------------|---|
