# Supplementary material for: Validation of the qi blood yin yang deficiency questionnaire on chronic fatigue
Source: PubMed Central journal article supplement (PMC4852426; doi:10.1186/s13020-016-0092-y), 2016-05-02
Supplement: 13020_2016_92_MOESM2_ESM.pdf [file 13020_2016_92_MOESM2_ESM.pdf]

## <Informed consent form>

Signature page

Title of the project

Clinical Trial for the Syndrome Differentiation of Consumptive Disease

ID: ME2-D97-H

|  |  |  |
|--|--|--|
|  |  |  |
|--|--|--|

The purpose of this project is to validate the PI questionnaires through clinical trials seeking to identify correlations between CF and responses to the *Qi Blood Yin Yang Deficiency Questionnaire (QBYQ)*.

I have read and understood the information about the project. I have been given the opportunity to ask questions about the project and my participation. I understand I can withdraw at any time without giving reasons and that I will not be penalized for withdrawing nor will I be questioned on why I have withdrawn. The use of the data in research, publications, sharing and archiving has been explained to me. I agree to sign and date this informed consent form.

| Participant's Printed Name | Signature of Participant | Date Signed |
|----------------------------|--------------------------|-------------|
|----------------------------|--------------------------|-------------|

| Parent's/Guardian's Printed Name | Signature of Participant | Date Signed |
|----------------------------------|--------------------------|-------------|
|----------------------------------|--------------------------|-------------|

| Principal Investigator Printed Name | Signature of Participant | Date Signed |
|-------------------------------------|--------------------------|-------------|
|-------------------------------------|--------------------------|-------------|

Attention

This project has been reviewed and approved by an Institutional Review Board of Cheonan Korean Medicine Hospital of Daejeon University.
